# Supplementary material for: Cosmogenic 3 He exposure dating in mafic rocks by 'Virtual mineral separation' of pyroxene
Source: Copernicus journal article supplement (doi:10.5194/egusphere-2025-3033), 2025-07-02
Supplement: Supplementary file 7 [file Table S1.xlsx]

## Sheet: Table S1A
Table S1A. Amount of 3He released during each heating steps for degassing experiment of LABCO-Plag-Dc. All measurements are blank corrected. No value indicated blank correction values below detection limit.
Sample name: LABCO-Plag-Dc
Step	Temperature (∘C)	Time (min)	3He (106 atoms)	±	Cumulative fractional release
1	24.12	30	0.000694169	0.0116577	0
2	49.13	60	0.0178244	0.0125	0.00192414
3	69.88	30	0.0226437	0.0129605	0.00427691
4	69.94	60	0.0390464	0.0150413	0.00833397
5	69.97	120	0.0977229	0.0158591	0.0184877
6	89.99	60	0.0968637	0.0178646	0.0285522
7	99.99	120	0.300317	0.022915	0.0597562
8	119.99	60	0.341496	0.0247404	0.0952388
9	119.99	120	0.608804	0.032057	0.158496
10	119.99	180	0.635096	0.033184	0.224484
11	139.98	60	0.532734	0.0341728	0.279837
12	139.99	120	0.744835	0.0323698	0.357228
13	139.99	180	0.715994	0.036371	0.431623
14	159.97	60	0.489376	0.0276955	0.48247
15	159.99	120	0.67021	0.0298665	0.552108
16	159.99	180	0.700847	0.0320227	0.624928
17	179.96	60	0.405329	0.025979	0.667043
18	179.94	120	0.602071	0.0289557	0.7296
19	179.99	180	0.62167	0.0298552	0.794194
20	199.97	60	0.331834	0.0253251	0.828673
21	199.99	120	0.428559	0.0246726	0.873202
22	199.99	180	0.341915	0.0249231	0.908728
23	219.87	15	0.0592314	0.0132073	0.914882
24	219.94	30	0.096061	0.0175486	0.924863
25	219.97	60	0.111158	0.0176966	0.936413
26	239.84	15	0.0530773	0.0145584	0.941928
27	239.91	30	0.0758385	0.0149151	0.949808
28	239.96	60	0.117275	0.0174679	0.961993
29	259.82	15	0.0306021	0.0145202	0.965173
30	259.91	30	0.0410446	0.0141422	0.969437
31	259.96	60	0.070428	0.0153622	0.976755
32	279.8	15	0.02367	0.0148301	0.979214
33	279.91	30	0.0310899	0.0141777	0.982445
34	279.95	60	0.0502045	0.015652	0.987661
35	299.85	15	0.0214685	0.0125734	0.989892
36	299.91	30	0.0306834	0.0136186	0.99308
37	299.96	60	0.0398073	0.0139643	0.997216
38	299.84	15	-	-	0.997216
39	324.8	15	0.00431047	0.0140326	0.997664
40	324.9	30	0.0224833	0.0112596	1
41	349.81	15	-	-	1

## Sheet: Table S1B
Table S1B. LABCO-Px-Dd
Step	Temperature (∘C)	Time (min)	3He (106 atoms)	±	Cumulative fractional release
1	24.17	30	0.00989195	0.013114	2.59033e-05
2	49.17	60	0.00825742	0.013499	4.75265e-05
3	69.87	30	-	-	4.75265e-05
4	69.9	60	-	-	4.75265e-05
5	69.96	120	0.0300724	0.0150258	0.000126275
6	89.99	60	0.0255112	0.015726	0.000193079
7	100	120	0.164201	0.0203648	0.000623061
8	119.98	60	0.273085	0.0261675	0.00133817
9	119.99	120	0.412274	0.0308909	0.00241776
10	120	180	0.370325	0.0299303	0.00338751
11	139.98	60	0.27283	0.0242016	0.00410195
12	139.99	120	0.42351	0.0279673	0.00521096
13	139.97	180	0.404574	0.0306974	0.00627039
14	159.97	60	0.294611	0.0282895	0.00704187
15	159.95	120	0.420228	0.0282897	0.00814229
16	159.99	180	0.39839	0.0285662	0.00918553
17	179.98	60	0.254154	0.0270171	0.00985107
18	179.99	120	0.400521	0.0276539	0.0108999
19	179.99	180	0.439506	0.0293011	0.0120508
20	199.97	60	0.280666	0.0250417	0.0127857
21	199.99	120	0.413895	0.0279042	0.0138696
22	199.99	180	0.418257	0.0272618	0.0149648
23	219.85	15	0.0775274	0.0174555	0.0151679
24	219.94	30	0.170936	0.0200085	0.0156155
25	219.96	60	0.287712	0.0256148	0.0163689
26	239.83	15	0.156257	0.0217782	0.0167781
27	239.91	30	0.347046	0.0269051	0.0176869
28	239.97	60	0.497151	0.03068	0.0189887
29	259.86	15	0.341672	0.027311	0.0198834
30	259.93	30	0.58703	0.0334627	0.0214206
31	259.96	60	0.85646	0.0414638	0.0236634
32	279.86	15	0.555459	0.0290799	0.0251179
33	279.92	30	0.981083	0.0438771	0.027687
34	279.96	60	1.76541	0.0576942	0.03231
35	299.84	15	1.07631	0.0450239	0.0351284
36	299.92	30	1.95651	0.065058	0.0402518
37	299.95	60	3.48686	0.0914739	0.0493826
38	299.83	15	0.796336	0.0407681	0.0514679
39	324.81	15	2.34657	0.0814074	0.0576127
40	324.9	30	4.68378	0.123767	0.0698778
41	349.81	15	6.43595	0.150955	0.0867312
42	349.56	30	11.3342	0.240837	0.116411
43	374.4	6	5.4809	0.122782	0.130764
44	374.78	15	12.8386	0.25624	0.164383
45	399.51	6	11.2201	0.23704	0.193764
46	399.81	15	22.4375	0.435189	0.25252
47	424.77	15	36.8752	0.685216	0.349082
48	424.87	30	42.6848	0.787472	0.460858
49	449.78	15	25.5349	0.487005	0.527725
50	449.9	30	29.7718	0.558884	0.605686
51	474.74	15	15.8928	0.316687	0.647303
52	474.88	30	17.8048	0.350084	0.693928
53	499.28	6	4.00649	0.10006	0.704419
54	499.58	10	5.42522	0.132334	0.718626
55	519.72	15	7.97057	0.170711	0.739498
56	539.73	15	6.78313	0.157784	0.75726
57	559.72	15	5.80123	0.138416	0.772451
58	579.71	15	5.42594	0.134683	0.78666
59	599.69	15	5.71356	0.133146	0.801622
60	629.78	20	9.70543	0.208371	0.827037
61	669.78	20	13.8503	0.283832	0.863305
62	699.77	20	13.8326	0.271848	0.899528
63	749.86	30	17.3547	0.345664	0.944973
64	774.81	30	7.21528	0.15879	0.963868
65	799.7	15	2.71089	0.074044	0.970966
66	829.75	15	2.71052	0.081269	0.978064
67	869.69	15	2.66384	0.0749362	0.98504
68	899.63	15	1.8878	0.0610489	0.989983
69	929.6	15	1.26423	0.0508311	0.993294
70	959.58	15	0.878877	0.0433602	0.995595
71	999.57	15	0.696746	0.0351131	0.99742
72	1098.53	15	0.620958	0.036916	0.999046
73	1099.73	30	0.232054	0.0236575	0.999654
74	1099.63	60	0.0898217	0.0198165	0.999889
75	1099.65	60	0.025555	0.0153555	0.999956
76	1149.3	15	0.016934	0.0154259	1

## Sheet: Table S1C
Table S1C. 15-OTW-049-CHA
Step	Temperature (∘C)	Time (min)	3He (106 atoms)	±	Cumulative fractional release
1	23.97	30	0.00297753	0.0156975	0.000102264
2	49.21	60	-	-	0.000102264
3	70.03	30	-	-	0.000102264
4	70.02	60	0.000840934	0.0149658	0.000131146
5	70.01	120	-	-	0.000131146
6	90.03	60	0.00465309	0.0158492	0.000290957
7	100.01	120	0.022649	0.0159917	0.00106884
8	120.03	60	-	-	0.00106884
9	120.01	120	0.0233669	0.0162077	0.00187138
10	120.01	180	0.0156652	0.0150052	0.00240941
11	140.03	60	0.00125761	0.0162086	0.0024526
12	140.02	120	0.0193895	0.016234	0.00311854
13	140.01	180	0.0226536	0.0171593	0.00389658
14	160.03	60	0.0166756	0.0156896	0.00446931
15	160.01	120	0.0414257	0.0168065	0.00589208
16	160.01	180	0.0461146	0.0167746	0.0074759
17	180.02	60	0.0512933	0.0177626	0.00923758
18	180.01	120	0.0492946	0.0171838	0.0109306
19	180.01	180	0.0301339	0.0168931	0.0119656
20	200.02	60	0.0384075	0.01758	0.0132847
21	200.01	120	0.0724136	0.0166786	0.0157717
22	200.01	180	0.0520175	0.0174194	0.0175583
23	220.06	15	0.0176192	0.0164002	0.0181634
24	220.04	30	0.0321011	0.0168545	0.019266
25	220.03	60	0.0501123	0.016671	0.0209871
26	240.1	15	0.0404155	0.016624	0.0223751
27	240.05	30	0.0623386	0.0182056	0.0245162
28	240.03	60	0.118059	0.0189404	0.028571
29	260.1	15	0.058248	0.0175182	0.0305715
30	260.04	30	0.118935	0.0198353	0.0346563
31	260.02	60	0.146415	0.0206599	0.039685
32	280.08	15	0.107653	0.01985	0.0433824
33	280.04	30	0.204155	0.0221299	0.0503941
34	280.02	60	0.264095	0.0264771	0.0594645
35	300.07	15	0.226223	0.0228913	0.0672342
36	300.03	30	0.338726	0.0255031	0.0788678
37	299.87	60	0.454323	0.0288737	0.0944716
38	300.07	15	0.0875361	0.0189978	0.0974781
39	325.02	15	0.444225	0.0293145	0.112735
40	325	30	0.679182	0.0321207	0.136062
41	349.98	15	1.10572	0.0487089	0.174038
42	350.02	30	1.46262	0.0582794	0.224272
43	375.01	6	0.793031	0.0395013	0.251509
44	375.01	15	1.43315	0.0604025	0.300731
45	399.81	6	1.43104	0.0594464	0.34988
46	399.97	15	2.3585	0.077327	0.430883
47	424.9	15	3.47474	0.112857	0.550224
48	424.95	30	2.63829	0.0853836	0.640837
49	449.9	15	1.57168	0.0593814	0.694816
50	449.95	30	1.40796	0.0569725	0.743173
51	474.87	15	0.905719	0.0420781	0.77428
52	474.93	30	0.892046	0.0410446	0.804918
53	499.61	6	0.26349	0.0249624	0.813967
54	499.72	10	0.366679	0.0256938	0.826561
55	519.8	15	0.5526	0.0339253	0.84554
56	539.75	15	0.536984	0.0301327	0.863983
57	559.75	15	0.409775	0.0288613	0.878057
58	579.73	15	0.360994	0.0274827	0.890455
59	599.69	15	0.281073	0.0243967	0.900109
60	629.75	20	0.358686	0.0264012	0.912428
61	669.74	20	0.340959	0.0263267	0.924138
62	699.73	20	0.255885	0.0241369	0.932927
63	749.74	30	0.300112	0.0300938	0.943234
64	774.75	30	0.153034	0.021814	0.94849
65	799.62	15	0.0719826	0.0184282	0.950962
66	829.78	15	0.0892711	0.0177388	0.954028
67	869.74	15	0.17322	0.0206829	0.959978
68	899.61	15	0.161654	0.0214805	0.96553
69	929.58	15	0.162224	0.0225521	0.971101
70	959.6	15	0.195499	0.0232775	0.977816
71	999.54	15	0.183616	0.0225219	0.984122
72	1098.84	15	0.395987	0.028153	0.997722
73	1099.52	30	0.0504479	0.0178303	0.999455
74	1099.81	60	0.0158721	0.0158041	1
