# Supplementary material for: Cosmogenic 3 He exposure dating in mafic rocks by 'Virtual mineral separation' of pyroxene
Source: Copernicus journal article supplement (doi:10.5194/egusphere-2025-3033), 2025-07-02
Supplement: Supplementary file 8 [file Table S2.xlsx]

## Sheet: A
Segmentation Report for A0000
Matrix
Voxel %: 83.42757
hi-mu
Voxel %: 0.18919
Segmentation steps:
Thresh, 24000 - 65535; con/exp: 22000 - 65535 (0/1)
px
Voxel %: 5.60750
Segmentation steps:
Remove Separated Components, infill with: 10924, expand by: 2
Thresh, 12000 - 65535; con/exp: 9500 - 65535 (0/1)
Remove Islands/Holes, islands; radius: 1.50
plag
Voxel %: 10.77574
Segmentation steps:
Remove Separated Components, infill with: 5878, expand by: 2
Thresh, 6500 - 65535; con/exp: 5500 - 65535 (0/1)
Remove Islands/Holes, islands; radius: 1.00

## Sheet: B
Segmentation Report for B0000
Matrix
Voxel %: 84.83017
hi-mu
Voxel %: 0.27707
Segmentation steps:
Thresh, 24000 - 65535; con/exp: 22000 - 65535 (0/1)
px
Voxel %: 5.02213
Segmentation steps:
Remove Separated Components, infill with: 10924, expand by: 2
Thresh, 12000 - 65535; con/exp: 9500 - 65535 (0/1)
Remove Islands/Holes, islands; radius: 1.00
plag
Voxel %: 9.87063
Segmentation steps:
Remove Separated Components, infill with: 5878, expand by: 2
Thresh, 6500 - 65535; con/exp: 5500 - 65535 (0/1)
Remove Islands/Holes, islands; radius: 1.00

## Sheet: C
Segmentation Report for C0000
Matrix
Voxel %: 85.20306
hi-mu
Voxel %: 0.15340
Segmentation steps:
Thresh, 24000 - 65535; con/exp: 22000 - 65535 (0/1)
px
Voxel %: 5.01268
Segmentation steps:
Remove Separated Components, infill with: 10924, expand by: 2
Thresh, 12000 - 65535; con/exp: 9500 - 65535 (0/1)
Remove Islands/Holes, islands; radius: 1.00
plag
Voxel %: 9.63087
Segmentation steps:
Remove Separated Components, infill with: 5878, expand by: 2
Thresh, 6500 - 65535; con/exp: 5500 - 65535 (0/1)
Remove Islands/Holes, islands; radius: 1.50

## Sheet: D
Segmentation Report for D0000
Matrix
Voxel %: 84.00156
hi-mu
Voxel %: 0.16640
Segmentation steps:
Thresh, 24000 - 65535; con/exp: 22000 - 65535 (0/1)
px
Voxel %: 5.72535
Segmentation steps:
Remove Separated Components, infill with: 10924, expand by: 2
Thresh, 12000 - 65535; con/exp: 9500 - 65535 (0/1)
Remove Islands/Holes, islands; radius: 1.00
plag
Voxel %: 10.10669
Segmentation steps:
Remove Separated Components, infill with: 5878, expand by: 2
Thresh, 6500 - 65535; con/exp: 5500 - 65535 (0/1)
Remove Islands/Holes, islands; radius: 1.00

## Sheet: E
Segmentation Report for E0000
Matrix
Voxel %: 84.40003
hi-mu
Voxel %: 0.23695
Segmentation steps:
Thresh, 24000 - 65535; con/exp: 22000 - 65535 (0/1)
px
Voxel %: 5.23100
Segmentation steps:
Remove Separated Components, infill with: 10924, expand by: 2
Thresh, 12000 - 65535; con/exp: 9500 - 65535 (0/1)
Remove Islands/Holes, islands; radius: 1.00
plag
Voxel %: 10.13202
Segmentation steps:
Remove Separated Components, infill with: 5878, expand by: 2
Thresh, 6500 - 65535; con/exp: 5500 - 65535 (0/1)
Remove Islands/Holes, islands; radius: 1.00

## Sheet: F
Segmentation Report for F0000
Matrix
Voxel %: 84.73826
hi-mu
Voxel %: 0.26747
Segmentation steps:
Thresh, 24000 - 65535; con/exp: 23000 - 65535 (0/1)
px
Voxel %: 4.57345
Segmentation steps:
Remove Separated Components, infill with: 10924, expand by: 2
Thresh, 12500 - 65535; con/exp: 9500 - 65535 (0/1)
Remove Islands/Holes, islands; radius: 1.00
plag
Voxel %: 10.42082
Segmentation steps:
Remove Separated Components, infill with: 5878, expand by: 2
Thresh, 7000 - 65535; con/exp: 5500 - 65535 (0/1)
Remove Islands/Holes, islands; radius: 1.50

## Sheet: G
Segmentation Report for G0000
Matrix
Voxel %: 83.71150
hi-mu
Voxel %: 0.35604
Segmentation steps:
Thresh, 24000 - 65535; con/exp: 22000 - 65535 (0/1)
px
Voxel %: 5.61641
Segmentation steps:
Remove Separated Components, infill with: 10924, expand by: 2
Thresh, 12000 - 65535; con/exp: 9500 - 65535 (0/1)
Remove Islands/Holes, islands; radius: 1.00
plag
Voxel %: 10.31605
Segmentation steps:
Remove Separated Components, infill with: 5878, expand by: 2
Thresh, 6500 - 65535; con/exp: 5500 - 65535 (0/1)
Remove Islands/Holes, islands; radius: 1.50

## Sheet: H
Segmentation Report for H0000
Matrix
Voxel %: 83.84986
hi-mu
Voxel %: 0.25027
Segmentation steps:
Thresh, 24000 - 65535; con/exp: 22000 - 65535 (0/1)
px
Voxel %: 4.74210
Segmentation steps:
Remove Separated Components, infill with: 10924, expand by: 2
Thresh, 12000 - 65535; con/exp: 9500 - 65535 (0/1)
Remove Islands/Holes, islands; radius: 1.00
plag
Voxel %: 11.15777
Segmentation steps:
Remove Separated Components, infill with: 5878, expand by: 2
Thresh, 6500 - 65535; con/exp: 5500 - 65535 (0/1)
Remove Islands/Holes, islands; radius: 1.00

## Sheet: I
Segmentation Report for I0000
Matrix
Voxel %: 82.56774
hi-mu
Voxel %: 0.36472
Segmentation steps:
Thresh, 24000 - 65535; con/exp: 22000 - 65535 (0/1)
px
Voxel %: 5.35542
Segmentation steps:
Remove Separated Components, infill with: 10924, expand by: 2
Thresh, 12000 - 65535; con/exp: 9500 - 65535 (0/1)
Remove Islands/Holes, islands; radius: 1.00
plag
Voxel %: 11.71212
Segmentation steps:
Remove Separated Components, infill with: 5878, expand by: 2
Thresh, 6500 - 65535; con/exp: 5500 - 65535 (0/1)
Remove Islands/Holes, islands; radius: 1.50

## Sheet: J
Segmentation Report for J0000
Matrix
Voxel %: 82.50320
hi-mu
Voxel %: 0.33273
Segmentation steps:
Thresh, 24000 - 65535; con/exp: 22000 - 65535 (0/1)
px
Voxel %: 5.29654
Segmentation steps:
Remove Separated Components, infill with: 10924, expand by: 2
Thresh, 12000 - 65535; con/exp: 9500 - 65535 (0/1)
Remove Islands/Holes, islands; radius: 1.00
plag
Voxel %: 11.86753
Segmentation steps:
Remove Separated Components, infill with: 5878, expand by: 2
Thresh, 6500 - 65535; con/exp: 5500 - 65535 (0/1)
Remove Islands/Holes, islands; radius: 1.00

[truncated: 46 more sheets: K, L, M, N, O, P, Q, R, S, T, U, X, V, Y, Z, AE, OE, AO, AA, BB …]
