# Supplementary material for: Cosmogenic 3 He exposure dating in mafic rocks by 'Virtual mineral separation' of pyroxene
Source: Copernicus journal article supplement (doi:10.5194/egusphere-2025-3033), 2025-07-02
Supplement: Supplementary file 9 [file Table S3.xlsx]

## Sheet: Sheet1
Table S2. Step-degassing He analyses for whole-rock Ferrar dolerite samples from Roberts and Otway Massif
Sample ID	Sample name	Aliquot	Heating temperature (°C)	Heating time (min)	Aliquot weight (g)	[He-3] (atoms/g)	δ[He-3] (atoms/g)	[He-3] (atoms/g)	δ[He-3] (atoms/g)	% error	[He-4] (atoms/g)	δ[He-4] (atoms/g)	[He-4] (atoms/g)	δ[He-4] (atoms/g)
A	15-OTW-001-MOG	a	1200	15	0.07942	1.54799e+09	6.20471e+07	1.59523e+09	6.2083e+07	3.89178	1.01668e+14	1.38668e+13	1.0655e+14	1.38828e+13
A	15-OTW-001-MOG	a	1300	12	0.07942	4.72442e+07	2.11246e+06				4.88183e+12	6.65955e+11
B	15-OTW-002-MOG	a	1200	15	0.05004	4.16106e+08	1.69489e+07	4.34007e+08	1.69804e+07	3.91247	1.47997e+14	2.01847e+13	1.6271e+14	2.02842e+13
B	15-OTW-002-MOG	a	1300	12	0.05004	1.79018e+07	1.03344e+06				1.47131e+13	2.0067e+12
C	15-OTW-003-MOG	a	1200	15	0.082	8.35629e+08	3.37108e+07	8.53396e+08	3.3723e+07	3.95162	1.12086e+14	1.52873e+13	1.1628e+14	1.5298e+13
C	15-OTW-003-MOG	a	1300	12	0.082	1.77668e+07	904866				4.1932e+12	5.72017e+11
D	15-OTW-004-MOG	a	1200	15	0.04577	1.31773e+09	5.30573e+07	1.36415e+09	5.31021e+07	3.89269	1.57643e+14	2.15007e+13	1.6881e+14	2.15546e+13
D	15-OTW-004-MOG	a	1300	12	0.04577	4.64182e+07	2.18194e+06				1.11667e+13	1.52312e+12
E	15-OTW-017-DUT	a	800	3	0.08234	8.96672e+08	1.46904e+07	1.01199e+09	1.48345e+07	1.46588	8.09931e+13	8.06457e+11	9.78567e+13	8.19157e+11
E	15-OTW-017-DUT	a	1200	15	0.08234	1.01332e+08	1.9927e+06				1.41187e+13	1.40823e+11
E	15-OTW-017-DUT	a	1300	12	0.08234	1.39868e+07	533529				2.74482e+12	2.85091e+10
F	15-OTW-020-DUT	a	800	3	0.08338	9.41969e+08	1.54712e+07	1.02507e+09	1.55526e+07	1.51722	9.16511e+13	9.84053e+11	1.08543e+14	9.94349e+11
F	15-OTW-020-DUT	a	1200	15	0.08338	7.61578e+07	1.5254e+06				1.40206e+13	1.39569e+11
F	15-OTW-020-DUT	a	1300	12	0.08338	6.94777e+06	446937				2.87112e+12	2.98442e+10
G	15-OTW-021-DUT	a	600	3	0.08139	7.38557e+08	1.21453e+07	1.41012e+09	1.61915e+07	1.14824	6.26929e+13	6.25394e+11	1.0874e+14	7.58826e+11
G	15-OTW-021-DUT	a	1200	15	0.08139	6.4271e+08	1.06796e+07				4.26334e+13	4.27987e+11
H	15-OTW-021-DUT	a	1300	12	0.08139	2.885e+07	776206				3.41363e+12	3.90762e+10
H	15-OTW-021-DUT	b	600	3	0.0847	6.68725e+08	1.09652e+07	1.22626e+09	1.41141e+07	1.15098	5.83356e+13	5.79951e+11	9.95114e+13	6.96811e+11
H	15-OTW-021-DUT	b	1200	15	0.0847	5.35699e+08	8.86029e+06				3.84181e+13	3.85188e+11
H	15-OTW-021-DUT	b	1300	12	0.0847	2.18375e+07	683099				2.75777e+12	2.88582e+10
I	15-OTW-021-DUT	c	600	3	0.08072	7.58985e+08	1.25671e+07	1.30246e+09	1.53151e+07	1.17586	6.1945e+13	6.16826e+11	1.00582e+14	7.27887e+11
I	15-OTW-021-DUT	c	1200	15	0.08072	5.19633e+08	8.716e+06				3.60866e+13	3.85563e+11
I	15-OTW-021-DUT	c	1300	12	0.08072	2.38443e+07	808514				2.55038e+12	2.62208e+10
J	15-OTW-022-DUT	a	600	3	0.08167	4.43696e+08	7.44268e+06	5.87128e+08	7.8866e+06	1.34325	7.80241e+13	8.25052e+11	1.05191e+14	8.6435e+11
J	15-OTW-022-DUT	a	1200	15	0.08167	1.39561e+08	2.55569e+06				2.57579e+13	2.57159e+11
J	15-OTW-022-DUT	a	1300	12	0.08167	3.87074e+06	522984				1.40879e+12	1.61009e+10
K	15-OTW-025-JOS	a	600	3	0.08266	5.7316e+08	9.52288e+06	7.81461e+08	1.01919e+07	1.30421	7.39845e+13	7.35111e+11	1.02409e+14	7.8088e+11
K	15-OTW-025-JOS	a	1200	15	0.08266	1.99335e+08	3.59677e+06				2.62869e+13	2.61879e+11
K	15-OTW-025-JOS	a	1300	12	0.08266	8.96668e+06	502074				2.13709e+12	2.83545e+10
L	15-OTW-026-JOS	a	600	3	0.08395	9.56174e+08	1.56048e+07	1.25067e+09	1.63704e+07	1.30893	7.99515e+13	7.95062e+11	1.11154e+14	8.48103e+11
L	15-OTW-026-JOS	a	1200	15	0.08395	2.8304e+08	4.9207e+06				2.94979e+13	2.94508e+11
L	15-OTW-026-JOS	a	1300	12	0.08395	1.14592e+07	517599				1.7044e+12	2.04965e+10
M	15-OTW-027-JOS	a	600	3	0.08367	1.13244e+09	1.84564e+07	1.73672e+09	2.07966e+07	1.19746	7.52689e+13	7.57452e+11	1.16307e+14	8.49373e+11
M	15-OTW-027-JOS	a	1200	15	0.08367	5.74229e+08	9.54972e+06				3.85027e+13	3.83343e+11
M	15-OTW-027-JOS	a	1300	12	0.08367	3.00505e+07	813199				2.53531e+12	2.73866e+10																			Expected	% change
N	15-OTW-032-JOS	a	600	3	0.08169	7.22219e+08	1.18327e+07	9.38614e+08	1.23774e+07	1.31869	6.75827e+13	6.77841e+11	100033173518509	7.44241e+11
N	15-OTW-032-JOS	a	1200	15	0.08169	2.06343e+08	3.59588e+06				3.06096e+13	3.0669e+11
N	15-OTW-032-JOS	a	1300	12	0.08169	1.00522e+07	508062				1.84095e+12	1.91766e+10
O	15-OTW-039-MON	a	600	3	0.05577	1.83504e+09	2.98864e+07	2.09204e+09	3.0226e+07	1.44481	9.7332e+13	9.66597e+11	1.29207e+14	1.01223e+12
O	15-OTW-039-MON	a	1200	15	0.05577	2.49254e+08	4.46996e+06				3.0165e+13	2.99775e+11
O	15-OTW-039-MON	a	1300	12	0.05577	7.74166e+06	661220				1.70986e+12	2.07279e+10
P	15-OTW-044-CHA	a	600	3	0.07	2.87131e+09	4.66997e+07	3.78927e+09	4.88386e+07	1.28887	7.94239e+13	7.88982e+11	1.28036e+14	9.04538e+11
P	15-OTW-044-CHA	a	1200	15	0.07	8.64052e+08	1.42286e+07				4.41089e+13	4.40024e+11
P	15-OTW-044-CHA	a	1300	12	0.07	5.39151e+07	1.37742e+06				4.50276e+12	4.55599e+10
Q	15-OTW-046-CHA	a	600	3	0.08196	2.8168e+09	4.58344e+07	3.2441e+09	4.6358e+07	1.429	6.63372e+13	6.67098e+11	9.36656e+13	7.14372e+11
Q	15-OTW-046-CHA	a	1200	15	0.08196	4.13348e+08	6.92502e+06				2.55438e+13	2.54779e+11
Q	15-OTW-046-CHA	a	1300	12	0.08196	1.39524e+07	566019				1.78463e+12	1.98853e+10
R	15-OTW-047-CHA	a	600	3	0.07014	1.93792e+09	3.15913e+07	2.46217e+09	3.2685e+07	1.32749	8.53061e+13	8.48861e+11	1.42014e+14	9.84752e+11
R	15-OTW-047-CHA	a	1200	15	0.07014	4.94127e+08	8.3386e+06				4.95659e+13	4.9401e+11
R	15-OTW-047-CHA	a	1300	12	0.07014	3.01192e+07	876607				7.14165e+12	7.15932e+10
S	15-OTW-047-CHA	b	600	3	0.07083	1.89496e+09	3.08412e+07	2.42677e+09	3.1963e+07	1.3171	8.66117e+13	8.61849e+11	1.36377e+14	9.70301e+11
S	15-OTW-047-CHA	b	1200	15	0.07083	5.00953e+08	8.34682e+06				4.45398e+13	4.42607e+11
S	15-OTW-047-CHA	b	1300	12	0.07083	3.08574e+07	885514				5.22504e+12	5.29041e+10
T	15-OTW-047-CHA	c	600	3	0.0715	1.87884e+09	3.05091e+07	2.41307e+09	3.16484e+07	1.31154	8.16226e+13	1.10944e+12	1.33311e+14	1.20053e+12
T	15-OTW-047-CHA	c	1200	15	0.0715	5.04851e+08	8.37455e+06				4.57798e+13	4.54729e+11
T	15-OTW-047-CHA	c	1300	12	0.0715	2.93782e+07	826400				5.90847e+12	6.03097e+10
U	15-OTW-049-CHA	a	600	3	0.0598	2.85955e+09	4.65478e+07	3.8862e+09	4.91337e+07	1.26431	8.01748e+13	7.98082e+11	1.35545e+14	9.4422e+11
U	15-OTW-049-CHA	a	1200	15	0.0598	9.50054e+08	1.56327e+07				5.03984e+13	5.02015e+11
U	15-OTW-049-CHA	a	1300	12	0.0598	7.65996e+07	1.74345e+06				4.97136e+12	5.0962e+10
V	15-OTW-051-CHA	a	600	3	0.08367	2.44962e+09	3.96574e+07	3.35197e+09	4.20715e+07	1.25513	7.36042e+13	7.342e+11	1.1219e+14	8.14916e+11
V	15-OTW-051-CHA	a	1200	15	0.08367	8.54194e+08	1.40049e+07				3.53859e+13	3.52077e+11
V	15-OTW-051-CHA	a	1300	12	0.08367	4.81543e+07	1.08035e+06				3.19963e+12	3.28693e+10
X	15-OTW-053-OLD	a	600	3	0.08096	3.00739e+09	4.86524e+07	4.85035e+09	5.62176e+07	1.15904	6.78717e+13	6.73748e+11	1.23921e+14	9.42256e+11
X	15-OTW-053-OLD	a	1200	15	0.08096	1.72247e+09	2.80786e+07				5.02164e+13	4.99012e+11
X	15-OTW-053-OLD	a	1300	12	0.08096	1.20488e+08	2.22579e+06				5.83335e+12	4.29997e+11
Y	15-ROB-009-MZB	a	600	3	0.04353	1.80625e+09	2.96676e+07	2.63433e+09	3.25313e+07	1.2349	1.33616e+14	1.32698e+12	2.14096e+14	1.53698e+12
Y	15-ROB-009-MZB	a	1200	15	0.04353	7.9726e+08	1.32965e+07				7.79366e+13	7.75013e+11
Y	15-ROB-009-MZB	a	1300	12	0.04353	3.08193e+07	1.14972e+06				2.54387e+12	2.81401e+10
Z	15-ROB-028-COL	a	600	3	0.0498	2.50551e+09	4.07909e+07	5.76508e+09	6.30783e+07	1.09414	7.17852e+13	7.13288e+11	1.64372e+14	1.12095e+12
Z	15-ROB-028-COL	a	1200	15	0.0498	2.93873e+09	4.77784e+07				8.67456e+13	8.62672e+11
Z	15-ROB-028-COL	a	1300	12	0.0498	3.20839e+08	5.67416e+06				5.84119e+12	5.94865e+10
AE	15-ROB-058-NAC	a	600	3	0.04107	4.51858e+08	7.9427e+06	6.31789e+08	8.68581e+06	1.3748	2.0522e+14	2.08464e+12	3.23905e+14	2.35754e+12
AE	15-ROB-058-NAC	a	1200	15	0.04107	1.65786e+08	3.37909e+06				1.10395e+14	1.09774e+12
AE	15-ROB-058-NAC	a	1300	12	0.04107	1.41441e+07	968853				8.29008e+12	8.49106e+10
OE	15-ROB-064-MUS	a	600	3	0.03964	1.92743e+08	3.74062e+06	3.61312e+08	4.99241e+06	1.38174	1.9903e+14	1.9792e+12	4.32995e+14	2.88298e+12
OE	15-ROB-064-MUS	a	1200	15	0.03964	1.48783e+08	3.14058e+06				2.08132e+14	2.08037e+12
OE	15-ROB-064-MUS	a	1300	12	0.03964	1.9786e+07	1.03377e+06				2.58334e+13	2.57689e+11
AO	16-ROB-002-NLI	a	600	3	0.08035	1.42342e+08	2.71119e+06	2.19029e+08	3.10154e+06	1.41604	8.5595e+13	8.58276e+11	1.52269e+14	1.05102e+12
AO	16-ROB-002-NLI	a	1200	15	0.08035	7.10905e+07	1.43854e+06				6.07464e+13	6.03648e+11
AO	16-ROB-002-NLI	a	1300	12	0.08035	5.59721e+06	446735				5.92787e+12	6.01947e+10
AA	16-ROB-032-WIN	a	600	3	0.04149	7.24408e+08	1.22866e+07	9.84561e+08	1.31286e+07	1.33345	1.6495e+14	1.64045e+12	243940978042497	1.80401e+12
AA	16-ROB-032-WIN	a	1200	15	0.04149	2.47866e+08	4.53798e+06				75430267218819	7.49623e+11
AA	16-ROB-032-WIN	a	1300	12	0.04149	1.22871e+07	897924				3.56047e+12	3.82204e+10
BB	16-ROB-042-SSU	a	600	3	0.04232	7.81843e+08	1.32467e+07	9.68194e+08	1.37289e+07	1.41799	249057190243327	2.47893e+12	3.77381e+14	2.75896e+12
BB	16-ROB-042-SSU	a	1200	15	0.04232	1.71775e+08	3.40181e+06				1.17723e+14	1.20643e+12
BB	16-ROB-042-SSU	a	1300	12	0.04232	1.45757e+07	1.19798e+06				1.06012e+13	1.06275e+11
CC	16-ROB-052-BAS	a	600	3	0.08234	7.3154e+08	1.19917e+07	1.11747e+09	1.35468e+07	1.21228	8.73417e+13	8.72165e+11	1.54287e+14	1.06648e+12
CC	16-ROB-052-BAS	a	1200	15	0.08234	3.67977e+08	6.27337e+06				6.14676e+13	6.11151e+11
CC	16-ROB-052-BAS	a	1300	12	0.08234	1.79556e+07	601255				5.47725e+12	5.6658e+10
DD	16-ROB-052-BAS	b	400	3	0.08127	1.18853e+07	534517	1.06966e+09	1.57023e+07	1.46798	3.84365e+12	8.85402e+10	1.64402e+14	2.55763e+12
DD	16-ROB-052-BAS	b	600	3	0.08127	4.97045e+08	1.08401e+07				7.43406e+13	1.70632e+12
DD	16-ROB-052-BAS	b	1200	15	0.08127	5.20022e+08	1.12928e+07				8.26849e+13	1.90143e+12
DD	16-ROB-052-BAS	b	1300	12	0.08127	4.0707e+07	1.11466e+06				3.53301e+12	8.155e+10
EE	16-ROB-052-BAS	c	400	3	0.08166	1.44613e+07	553448	8.75599e+08	1.36301e+07	1.55666	3.79439e+12	8.75187e+10	1.51026e+14	2.29894e+12
EE	16-ROB-052-BAS	c	600	3	0.08166	4.31376e+08	9.98431e+06				7.00671e+13	1.61054e+12
EE	16-ROB-052-BAS	c	1200	15	0.08166	4.11348e+08	9.24293e+06				7.11219e+13	1.63228e+12
EE	16-ROB-052-BAS	c	1300	12	0.08166	1.84137e+07	596931				6.04253e+12	1.38922e+11
FF	16-ROB-054-BAS	a	600	3	0.04159	4.88988e+08	8.44637e+06	1.04854e+09	1.25988e+07	1.20156	1.70973e+14	1.7e+12	4.38712e+14	3.02508e+12
FF	16-ROB-054-BAS	a	1200	15	0.04159	5.30114e+08	9.27979e+06				2.50352e+14	2.49621e+12
FF	16-ROB-054-BAS	a	1300	12	0.04159	2.94335e+07	1.12904e+06				1.73862e+13	1.73457e+11
GG	16-ROB-069-MNM	a	600	3	0.04223	9.80483e+07	2.9502e+06	1.5087e+08	3.723e+06	2.46769	1.73727e+14	5.71637e+12	3.31929e+14	5.89244e+12
GG	16-ROB-069-MNM	a	1200	15	0.04223	4.92656e+07	2.1525e+06				1.43024e+14	1.42156e+12
GG	16-ROB-069-MNM	a	1300	12	0.04223	3.55585e+06	723723				1.51785e+13	1.52173e+11
HH	16-ROB-071-MNM	a	600	3	0.04086	1.46849e+08	3.00441e+06	2.06499e+08	3.44939e+06	1.67041	1.73595e+14	1.72472e+12	2.9824e+14	2.04846e+12
HH	16-ROB-071-MNM	a	1200	15	0.04086	5.16823e+07	1.471e+06				1.09932e+14	1.09537e+12
HH	16-ROB-071-MNM	a	1300	12	0.04086	7.96762e+06	841403				1.47136e+13	1.47245e+11
II	16-ROB-072-MNM	a	600	3	0.04089	1.00311e+08	2.72983e+06	1.74488e+08	3.35186e+06	1.92097	1.58388e+14	1.57759e+12	3.22426e+14	2.2221e+12
II	16-ROB-072-MNM	a	1200	15	0.04089	6.95279e+07	1.79919e+06				1.54432e+14	1.56169e+12
II	16-ROB-072-MNM	a	1300	12	0.04089	4.6487e+06	738876				9.60636e+12	1.00417e+11
JJ	16-ROB-082-WIN	a	600	3	0.08334	9.08048e+07	1.74372e+06	1.32772e+08	2.03302e+06	1.53121	6.51307e+13	6.51426e+11	1.11322e+14	7.64107e+11
JJ	16-ROB-082-WIN	a	1200	15	0.08334	3.93197e+07	979684				3.91804e+13	3.93174e+11
JJ	16-ROB-082-WIN	a	1300	12	0.08334	2.64717e+06	364432				7.01136e+12	7.01314e+10
KK	16-ROB-084-WIN	a	600	3	0.07054	1.62732e+08	2.95348e+06	2.35713e+08	3.3402e+06	1.41707	7.92254e+13	8.30025e+11	1.3102e+14	9.48005e+11
KK	16-ROB-084-WIN	a	1200	15	0.07054	6.91886e+07	1.48864e+06				4.56886e+13	4.53821e+11
KK	16-ROB-084-WIN	a	1300	12	0.07054	3.79169e+06	466714				6.10565e+12	6.17957e+10
LL	16-ROB-085-WIN	a	600	3	0.04177	2.23781e+08	4.15893e+06	3.45968e+08	5.06731e+06	1.46467	1.89361e+14	1.90124e+12	3.19615e+14	2.27155e+12
LL	16-ROB-085-WIN	a	1200	15	0.04177	1.16388e+08	2.72277e+06				1.25052e+14	1.24192e+12
LL	16-ROB-085-WIN	a	1300	12	0.04177	5.79927e+06	983557				5.20243e+12	5.33965e+10
MM	16-ROB-106-WAL	a	600	3	0.04245	7.81292e+08	1.32375e+07	1.11055e+09	1.50131e+07	1.35186	1.98593e+14	1.9714e+12	3.40581e+14	2.42768e+12
MM	16-ROB-106-WAL	a	1200	15	0.04245	3.06716e+08	6.79925e+06				1.3139e+14	1.41259e+12
MM	16-ROB-106-WAL	a	1300	12	0.04245	2.25469e+07	1.98316e+06				1.0598e+13	1.08694e+11
NN	16-ROB-118-BBY	a	600	3	0.04194	7.13489e+08	1.21137e+07	9.47338e+08	1.28607e+07	1.35756	1.781e+14	1.77561e+12	2.93897e+14	2.08178e+12
NN	16-ROB-118-BBY	a	1200	15	0.04194	2.16694e+08	4.20875e+06				1.08952e+14	1.08446e+12
NN	16-ROB-118-BBY	a	1300	12	0.04194	1.71552e+07	971083				6.84421e+12	7.01816e+10
